# Supplementary material for: The effectiveness of nudging: A meta-analysis of choice architecture interventions across behavioral domains
Source: PubMed Central journal article supplement — Proc Natl Acad Sci U S A. 2021 Dec 30;119(1):e2107346118. doi: 10.1073/pnas.2107346118 (PMC8740589; doi:10.1073/pnas.2107346118), 2021-12-30
Supplement: pnas.2107346118.sapp.pdf [file pnas.2107346118.sapp.pdf]

1

2 **Supplementary Information for**  
3 **The effectiveness of nudging: A meta-analysis of choice**  
4 **architecture interventions across behavioral domains**

5 **Stephanie Mertens, Mario Herberz, Ulf J. J. Hahnel, and Tobias Brosch**

6 **Stephanie Mertens; Tobias Brosch**

7 **E-mail: [stephanie.mertens@unige.ch](mailto:stephanie.mertens@unige.ch); [tobias.brosch@unige.ch](mailto:tobias.brosch@unige.ch)**

8 **This PDF file includes:**

- 9     Supplementary text
- 10    Fig. S1
- 11    Tables S1 to S4
- 12    SI References

## 13 Supporting Information Text

### 14 Materials and Methods

15 The meta-analysis was conducted in accordance with guidelines for conducting systematic reviews (1) and conforms  
16 to the Preferred Reporting Items for Systematic Reviews and Meta-Analyses (PRISMA; 2) standards.

17 **Literature search and review process.** Figure S1 illustrates the literature search and review process. Our initial  
18 literature search identified a total of 10,480 published articles through the electronic databases PsycINFO, PubMed,  
19 PubPsych, and ScienceDirect as well as through the reference lists of relevant review articles. In addition, 71  
20 unpublished articles were identified through governmental and non-governmental behavioral science units, the  
21 ProQuest Dissertations & Theses database, and calls for unpublished data in academic mailing lists. The final sample  
22 comprised 455 effect sizes from 214 publications.

23 **Effect size calculation.** To integrate the results of the publications identified as part of the literature search and  
24 review process, we calculated Cohen's  $d$  (3) for a standardized effect size measure of the mean difference between  
25 control and treatment conditions. For outcome variables that were measured on a continuous scale (e.g., the amount  
26 of money donated to charity), Cohen's  $d$  was calculated as the difference between means divided by the combined  
27 standard deviation. For dichotomous outcome variables (e.g., proportion of subjects donating to charity), Cohen's  $d$   
28 was calculated using the arcsine transformation illustrated in the equations below, where  $p$  equals the proportion of  
29 respondents showing the behavioral outcome of interest (4).

$$\varphi = 2\arcsin\sqrt{p}$$
$$\text{Cohen's } d = \varphi_{\text{treatment}} - \varphi_{\text{control}}$$

32 Positive Cohen's  $d$  values were coded to reflect behavior change in the predicted direction, whereas negative values  
33 reflected an unpredicted change in behavior. If more than one outcome measure were reported, we selected the  
34 outcome that was identified as the primary variable of interest by the authors of the respective study. If no clear  
35 distinction was made between outcome variables or more than one outcome was identified to be of primary interest,  
36 all relevant outcome measures were coded. In cases where a behavioral outcome was measured at multiple time  
37 points, we coded the effect closest in time to the intervention as using later follow-up measures may confound the  
38 true intervention effect with the persistence of the effect (4).

39 **Missing data.** In cases where studies did not report the respective sample size of their control and treatment conditions,  
40 we estimated sample sizes by dividing the overall size of the study sample by the number of conditions. Where effect  
41 sizes could not be calculated based on the information provided, we contacted authors for the missing information.  
42 Studies for which no effect size could be calculated even after contacting authors were excluded from the analyses  
43 ( $n = 11$ ).

44 **Moderator coding.** Studies were coded by three raters (first and second authors of this paper as well as a graduate  
45 research assistant). Following an initial training phase in which raters coded and discussed a reduced set of 30 studies,  
46 each rater continued to independently code an assigned part of the remaining database. Given the large number of  
47 studies, this division of coding was deemed necessary to ensure a timely analysis of the data. Throughout the coding  
48 process, raters followed a written protocol that outlined the inclusion and exclusion criteria for studies, definitions and  
49 examples of key moderators, and detailed instructions for the extraction of data (see section *Effect size calculation*  
50 above.) Interrater reliability across a random sample of 20% of the publications was high, with Cohen's  $\kappa$  ranging  
51 from 0.76 to 1 ( $M = 0.87$ ). Any disagreements in coding were resolved by discussion. Table S1 provides an overview  
52 of the categorization of studies across the three key moderators intervention category, intervention technique, and  
53 behavioral domain. The full dataset is publicly available on the Open Science Framework (<https://osf.io/fywaef/>).

54 **Classification of choice architecture interventions.** Choice architecture interventions were classified using a taxonomy  
55 developed by Münscher and colleagues (5) which distinguishes three categories of choice architecture interventions:  
56 *decision information*, *decision structure*, and *decision assistance* (5). Each of these categories comprises specific  
57 intervention techniques that target different aspects of the choice environment, with decision information interventions  
58 targeting the way in which choice alternatives are described (e.g., framing, social reference points); decision structure  
59 interventions targeting the way in which those choice alternatives are organized and structured (e.g., choice defaults,  
60 effort); and decision assistance interventions targeting the way in which decisions can be reinforced (e.g., reminders,  
61 commitment devices). For an overview of the taxonomy including examples, see Table 1 in the manuscript.

62 **Classification of behavioral domains.** Based on a previous scoping review of the choice architecture literature (6) and  
63 inspection of our data, interventions were categorized to belong to one of six behavioral domains: health, food,  
64 environment, finance, pro-social behavior, and other behavior (Table S2 reports the distribution of effect sizes across  
65 behavioral domains). Studies were coded to fall only under a single behavioral domain (for a similar approach see  
66 7–9). In cases where studies qualified for more than one domain, the more distinct domain was chosen. This was  
67 primarily the case in studies that investigated choice architecture interventions in a consumer context. Here, we  
68 only categorized studies under the domain of consumer choice if they did not fall under any of the other behavioral  
69 domains. For example, studies that investigated the effectiveness of choice architecture interventions in promoting the  
70 purchase of energy efficient appliances were categorized under the behavioral domain of environment rather than  
71 consumer choice. Overall, interrater reliability for behavioral domain was very high ( $\kappa = 0.97$ ).

72 **Classification of contextual study characteristics.** Table S2 reports the distribution of effect sizes across the four contextual  
73 study characteristics investigated in our meta-analysis (i.e., geographical location, target population, type of experiment,  
74 and year of publication\*). Type of experiment was classified using the taxonomy by Harrison and List (10), which  
75 distinguishes between conventional lab experiments, artefactual field experiments, framed field experiments, and  
76 natural field experiments.

77 **Statistical analysis.** All analyses reported in the paper are publicly available on the Open Science Framework  
78 (<https://osf.io/fywae/>).

79 **Effect size estimation.** Since the majority of publications included in our meta-analysis reported multiple relevant  
80 outcome variables and/or more than one study, we estimated the overall effect of choice architecture interventions  
81 using a three-level meta-analytic model (see below for model specification within R Package `metafor`, 11). This  
82 approach allowed us to account for the hierarchical structure in our data (i.e., the nesting of effect sizes within  
83 publications) that would otherwise violate the assumption of independence of traditional meta-analytic approaches  
84 (4). Specifically, our three-level model accounted for variance in the observed effect sizes (level 1), variance between  
85 effect sizes within the same publication (level 2), and variance between publications (level 3).

```
86 rma.mv_model -> rma.mv(cohens_d, variance_d, data = df,  
87 random = ~ 1 | publication_id/es_id, tdist = TRUE)
```

88 Although this multilevel approach accounts for the hierarchical dependence among effect sizes, it does not control for  
89 any dependence in sampling errors due to overlapping samples (e.g., in cases where multiple treatment conditions are  
90 compared to the same control condition). We therefore calculated cluster-robust standard errors, confidence intervals,  
91 and statistical tests for each effect size estimate (see below for specification within R Package `metafor`, 11–13). Since  
92 samples only overlapped on a study level, we defined clusters on the basis of study rather than publication<sup>†</sup>.

```
93 robust(rma.mv_model, cluster = df$study_id, adjust = TRUE)
```

94 **Sensitivity analysis.** To test the robustness of the effect size of choice architecture interventions, we first examined the  
95 data for influential outliers. Influential outliers were defined as effect sizes with standardized residual values above  
96 3 (14) and Cook's distance values above 0.009. Following Fox (15), this cut-off value was based on the calculation  
97 of  $4/(n - k - 1)$ , where  $n$  refers to the overall number of effect sizes included in the analysis and  $k$  refers to the  
98 number of parameters of interest<sup>‡</sup>. Based on these criteria, we identified three influential outliers, with Cohen's  $d$   
99 values ranging between 3.08 and 4.69 (16, 17). To analyze the extent to which these outliers drove the overall effect  
100 size of choice architecture interventions, we removed them from our analysis and re-estimated the effect of choice  
101 architecture interventions on behavior. Complementing the analysis of influential outliers, we ran two additional  
102 robustness checks that estimated the impact of each individual effect size and publication on the overall effect of  
103 choice architecture interventions. To this end, we followed a leave-one-out procedure in which the effect of choice  
104 architecture was repeatedly re-estimated while leaving out one effect size or one publication at a time.

\*Note that some previously unpublished studies have been published since the literature search for this meta-analysis was completed. The year of publication reported here and in the main manuscript reflects the latest publication status of studies.

<sup>†</sup>Note that studies were defined based on samples rather than experiments to adequately reflect dependence. In cases where two or more independent samples were reported within the same experiment (e.g., experiments with more than one categorical independent variable or multiple intervention sites), unique study IDs were assigned to each observation; in cases where multiple treatment conditions within an experiment were compared to the same control condition, the same study ID was assigned to each observation.

<sup>‡</sup>Note that this approach produces a conservative estimate of influence; others have suggested using a Cook's distance value of  $> 1$  as a cut-off (14).

105 **Moderator analyses.** In order to identify systematic differences between choice architecture interventions, we ran  
106 multiple moderator analyses in which we independently tested for the effects of type of intervention, behavioral  
107 domain, and contextual study characteristics. For these analyses, we extended our meta-analytic model to include  
108 fixed effects for each moderator of interest. To analyze the effect of type of intervention, for example, we extended  
109 the model to include dummy coded variables for the three intervention categories and nine intervention techniques  
110 defined by Münscher et al.'s taxonomy (5), respectively. Similarly, we introduced dummy coded variables for the  
111 six behavioral domains we identified during coding to analyze potential differences in the effectiveness of choice  
112 architecture interventions across domains. Both models were combined to determine the specific effect of each  
113 intervention category in each individual behavioral domain. In all four of these moderator analyses, we included  
114 year of publication as a standardized covariate to control for contextual confounds and thus render more precise  
115 effect size estimates. Introducing additional study characteristics as covariates did not improve the model fit. For  
116 parsimony reasons, we therefore restrained the number of covariates in the model to year of publication (see below for  
117 sample specification within R Package `metafor`, 11). Finally, to test the extent to which general study characteristics  
118 influenced the effect of choice architecture interventions, we extended our meta-analytic model to include dummy  
119 coded variables for type of location, target population, type of experiment, and a standardized variable for the year in  
120 which the data were published, respectively.

```
121     rma.mv(cohens_d, variance_d, mods = ~ factor(intervention_category) * factor(domain) +  
122           scale(year), data = df, random = ~ 1 | publication_id/es_id, tdist = TRUE)
```

## 123 Results

124 **Heterogeneity across moderators.** Introducing intervention category as a moderator in our meta-analytic model  
125 marginally decreased the ratio of true to total variability in effect sizes from  $I^2 = 99.67\%$  to  $I^2 = 99.57\%$ . Likewise,  
126 including behavioral domain as a moderator decreased heterogeneity to  $I^2 = 99.58\%$ . As illustrated in Table S3, both  
127 moderators had a stronger effect on the heterogeneity between publications than within publications. Introducing  
128 general study characteristics as moderators similarly decreased the ratio of true to total heterogeneity to  $I^2 = 99.62\%$ .  
129 Entering all moderators into our meta-analytic model decreased heterogeneity among effect sizes to  $I^2 = 99.53\%$ .

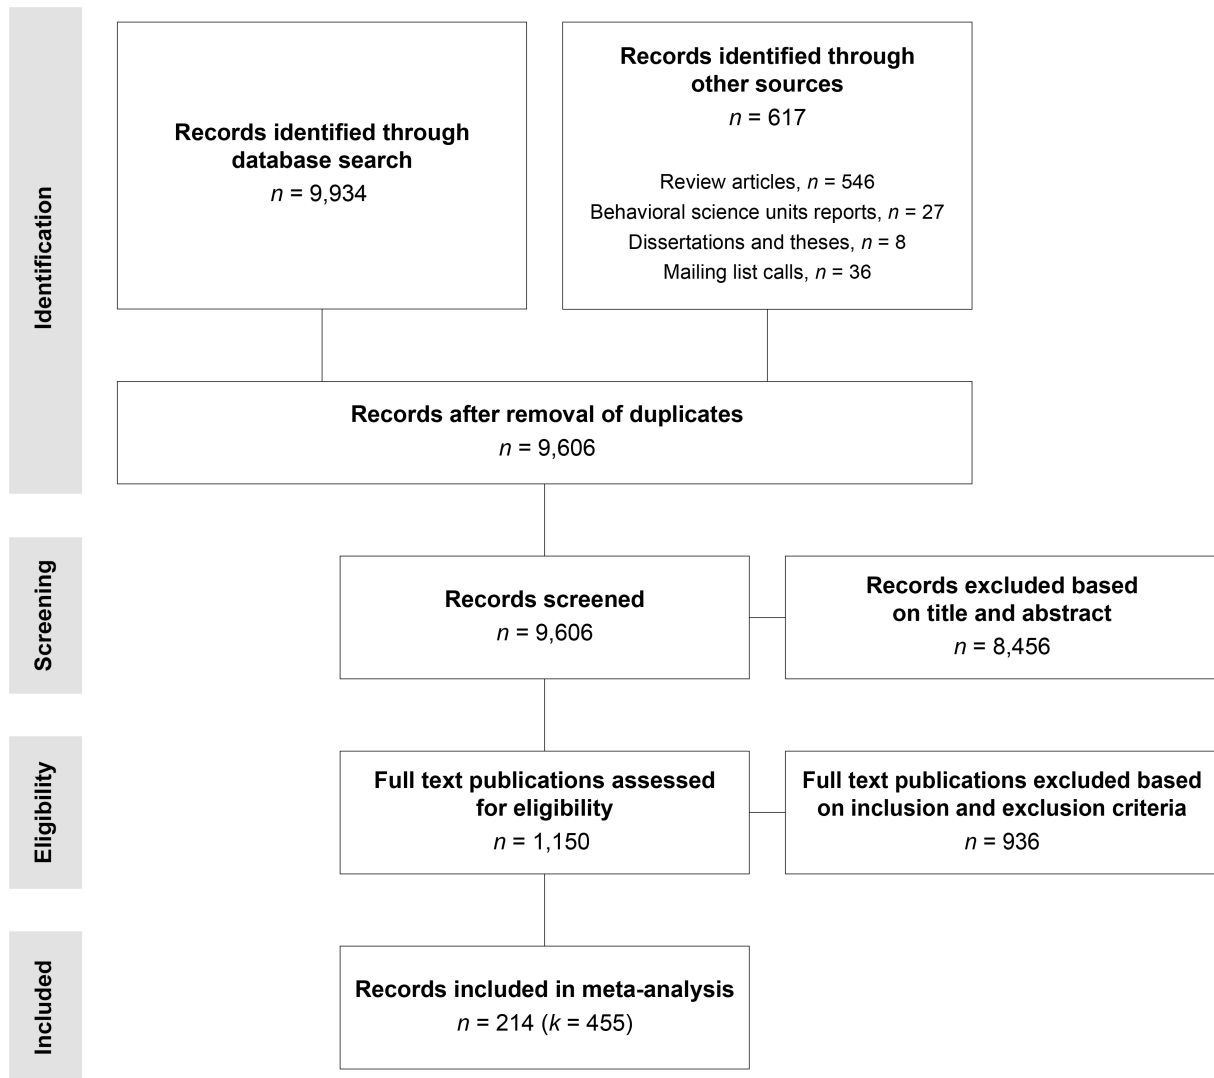

Fig. S1. Flow diagram illustrating the literature search and review process.

**Table S1. Categorization of studies across key moderators.**

| Reference                                                                                                          | Categorization        |                        |                   |
|--------------------------------------------------------------------------------------------------------------------|-----------------------|------------------------|-------------------|
|                                                                                                                    | Intervention category | Intervention technique | Behavioral domain |
| Abhyankar et al. (2014)                                                                                            | Structure             | Default                | Health            |
| Aleman et al. (2019)                                                                                               | Information           | Visibility             | Other             |
| Alinia et al. (2011)                                                                                               | Structure             | Effort                 | Food              |
| Ansher et al. (2013)                                                                                               | Structure             | Default                | Health            |
| Antonuk & Block (2006)                                                                                             | Information           | Translation            | Food              |
| Anzman-Frasca et al. (2018)                                                                                        | Assistance            | Reminder               | Food              |
| Araña & León (2013)                                                                                                | Structure             | Default                | Environment       |
| Bachman & Katzev (1982)                                                                                            | Assistance            | Commitment             | Environment       |
| Bacon & Krpan (2018), treatment 1                                                                                  | Information           | Social reference       | Food              |
| Bacon & Krpan (2018), treatment 2                                                                                  | Structure             | Composition            | Food              |
| Baek et al. (2014)                                                                                                 | Structure             | Default                | Other             |
| Bamberg (2002)                                                                                                     | Assistance            | Commitment             | Environment       |
| Banks (1995)                                                                                                       | Information           | Translation            | Health            |
| Barnes et al. (2021), experiment 1, treatment 1                                                                    | Information           | Visibility             | Finance           |
| Barnes et al. (2021), experiment 2, treatment 1                                                                    | Assistance            | Reminder               | Finance           |
| Bartke et al. (2017), treatment 1                                                                                  | Information           | Social reference       | Pro-social        |
| Basu & Savani (2017), experiment 1                                                                                 | Structure             | Composition            | Other             |
| Basu & Savani (2017), experiment 2–7                                                                               | Structure             | Composition            | Finance           |
| Behavioural Economics Team of the Australian Government (2017)                                                     | Information           | Visibility             | Other             |
| Behavioural Economics Team of the Australian Government (2018)                                                     | Information           | Translation            | Environment       |
| Behavioural Economics & Research Team, Behavioural Economics Team of the Australian Government (2018), treatment 1 | Information           | Visibility             | Health            |
| Economics Team of the Australian Government (2018), treatment 2                                                    | Information           | Social reference       | Health            |
| Behavioural Economics Team of the Australian Government (2019), treatment 1–3                                      | Assistance            | Reminder               | Finance           |
| Behavioural Insights Team (2013), treatment 1–3                                                                    | Information           | Social reference       | Pro-social        |
| Behavioural Insights Team (2013), treatment 4–5                                                                    | Information           | Visibility             | Pro-social        |
| Bergeron et al. (2019)                                                                                             | Structure             | Default                | Food              |
| Bhanot (2017)                                                                                                      | Assistance            | Commitment             | Finance           |
| Bogliacino et al. (2015), treatment 1                                                                              | Structure             | Default                | Health            |
| Böhm & Theelen (2016), experiment 1                                                                                | Information           | Translation            | Pro-social        |
| Böhm & Theelen (2016), experiment 2                                                                                | Information           | Translation            | Environment       |

*Note.* Unless otherwise noted, the categorizations displayed here reflect the coding of all treatment conditions and studies reported in the respective publication.

**Table S1 (continued).**

| Reference                                     | Categorization        |                        |                   |
|-----------------------------------------------|-----------------------|------------------------|-------------------|
|                                               | Intervention category | Intervention technique | Behavioral domain |
| Bohnet et al. (2016)                          | Structure             | Composition            | Other             |
| Broman et al. (2014), experiment 1            | Structure             | Default                | Environment       |
| Bronchetti et al. (2011)                      | Structure             | Default                | Finance           |
| Brook & Servátka (2016)                       | Information           | Visibility             | Pro-social        |
| Bruns et al. (2018), treatment 1              | Structure             | Default                | Environment       |
| Bucher et al. (2014)                          | Structure             | Composition            | Food              |
| Burns & Rothman (2015), experiment 2          | Structure             | Composition            | Food              |
| Byrd et al. (2018), treatment 2–3             | Information           | Visibility             | Food              |
| Camilleri & Larrick (2014)                    | Information           | Translation            | Environment       |
| Capraro et al. (2018)                         | Assistance            | Reminder               | Pro-social        |
| Carrera et al. (2018)                         | Assistance            | Commitment             | Health            |
| Carroll et al. (2018)                         | Structure             | Composition            | Food              |
| Carter & González-Vallejo (2018), treatment 1 | Assistance            | Reminder               | Food              |
| Castleman & Page (2015), treatment 1          | Assistance            | Reminder               | Other             |
| Castleman & Page (2016)                       | Assistance            | Reminder               | Other             |
| Catlin & Wang (2013), experiment 1            | Structure             | Consequence            | Environment       |
| Chapman et al. (2010)                         | Structure             | Default                | Health            |
| Chen et al. (2016)                            | Structure             | Consequence            | Pro-social        |
| Cheung et al. (2017)                          | Information           | Social reference       | Food              |
| Chou & Murnighan (2013), experiment 2         | Information           | Translation            | Pro-social        |
| Courtright et al. (2017)                      | Structure             | Composition            | Health            |
| Coventry et al. (2016)                        | Information           | Social reference       | Other             |
| D'Adda et al. (2017), treatment 1             | Structure             | Default                | Pro-social        |
| D'Adda et al. (2017), treatment 2             | Information           | Social reference       | Pro-social        |
| Damgaard & Gravert (2018)                     | Assistance            | Reminder               | Pro-social        |
| De Wild et al. (2015)                         | Structure             | Composition            | Food              |
| Demarque et al. (2015)                        | Information           | Social reference       | Environment       |
| Dickerson et al. (1992), treatment 2          | Assistance            | Reminder               | Environment       |
| Dickerson et al. (1992), treatment 3          | Assistance            | Commitment             | Environment       |
| Diliberti et al. (2004)                       | Structure             | Default                | Food              |
| Dinner et al. (2011)                          | Structure             | Default                | Environment       |
| Dogruel et al. (2017)                         | Structure             | Default                | Other             |
| Dos Santos et al. (2020)                      | Assistance            | Reminder               | Food              |
| Ebeling & Lotz (2015)                         | Structure             | Default                | Environment       |
| Engell et al. (1996)                          | Structure             | Effort                 | Food              |
| Evans et al. (2011)                           | Structure             | Default                | Finance           |

*Note.* Unless otherwise noted, the categorizations displayed here reflect the coding of all treatment conditions and studies reported in the respective publication.

**Table S1 (continued).**

| Reference                                           | Categorization        |                        |                   |
|-----------------------------------------------------|-----------------------|------------------------|-------------------|
|                                                     | Intervention category | Intervention technique | Behavioral domain |
| Everett et al. (2015), experiment 1, 3              | Structure             | Default                | Pro-social        |
| Everett et al. (2015), experiment 2                 | Structure             | Default                | Environment       |
| Faralla et al. (2017)                               | Information           | Translation            | Finance           |
| Firmino-Machado et al. (2018)                       | Assistance            | Reminder               | Health            |
| Fisher (2018)                                       | Information           | Visibility             | Food              |
| Frydman & Rangel (2014)                             | Information           | Visibility             | Finance           |
| Ganzach & Karsahi (1995)                            | Information           | Translation            | Finance           |
| Gärtner (2018)                                      | Structure             | Default                | Pro-social        |
| Geier et al. (2012)                                 | Structure             | Composition            | Food              |
| Gerend (2009)                                       | Information           | Visibility             | Food              |
| Goldstein et al. (2011), experiment 2–5             | Structure             | Consequence            | Pro-social        |
| Goldzahl et al. (2018), treatment 1, 3              | Information           | Social reference       | Health            |
| Gomez et al. (2016)                                 | Structure             | Composition            | Other             |
| Gong et al. (2017)                                  | Information           | Translation            | Environment       |
| Gopalan et al. (2014)                               | Information           | Translation            | Health            |
| Goswami & Urminsky (2016)                           | Structure             | Default                | Pro-social        |
| Grant et al. (2018)                                 | Information           | Translation            | Health            |
| Grépin et al. (2019), treatment 3a, 3b              | Assistance            | Reminder               | Health            |
| Hainmueller et al. (2018), treatment 1, 2           | Assistance            | Reminder               | Other             |
| Hainmueller et al. (2018), treatment 4              | Structure             | Effort                 | Other             |
| Hallsworth et al. (2015), experiment 1, treatment 1 | Structure             | Effort                 | Health            |
| Hallsworth et al. (2015), experiment 2, treatment 1 | Information           | Translation            | Health            |
| Halpern et al. (2013)                               | Structure             | Default                | Health            |
| Handgraaf et al. (2013)                             | Information           | Visibility             | Environment       |
| Harnack et al. (2008), treatment 1                  | Information           | Visibility             | Food              |
| Haward et al. (2012)                                | Structure             | Default                | Health            |
| Hedlin & Sunstein (2016)                            | Structure             | Default                | Environment       |
| Hershfield et al. (2014), experiment 2              | Information           | Translation            | Environment       |
| Hilton et al. (2014), experiment 1                  | Assistance            | Reminder               | Environment       |
| Hou (2017), experiment 1                            | Information           | Social reference       | Food              |
| Hu et al. (2018)                                    | Information           | Social reference       | Other             |
| Impact and Innovation Unit (2018), treatment 2      | Structure             | Consequence            | Pro-social        |
| Impact and Innovation Unit (2018), treatment 3–4    | Information           | Visibility             | Pro-social        |

*Note.* Unless otherwise noted, the categorizations displayed here reflect the coding of all treatment conditions and studies reported in the respective publication.



**Table S1 (continued).**

| Reference                                           | Categorization        |                        |                   |
|-----------------------------------------------------|-----------------------|------------------------|-------------------|
|                                                     | Intervention category | Intervention technique | Behavioral domain |
| Impact and Innovation Unit (2018), treatment 5–6    | Information           | Social reference       | Pro-social        |
| Impact and Innovation Unit (2018), treatment 7      | Information           | Translation            | Pro-social        |
| Isaksen et al. (2019)                               | Information           | Translation            | Pro-social        |
| Jin (2011)                                          | Structure             | Default                | Other             |
| Johnson & Goldstein (2003)                          | Structure             | Default                | Pro-social        |
| Johnson et al. (1993), experiment 4                 | Information           | Translation            | Finance           |
| Johnson et al. (1993), experiment 6                 | Structure             | Default                | Finance           |
| Johnson et al. (2002)                               | Structure             | Default                | Other             |
| Johnston et al. (2018)                              | Information           | Social reference       | Other             |
| Junger et al. (2017), treatment 2                   | Assistance            | Reminder               | Other             |
| Keller et al. (2011)                                | Structure             | Default                | Health            |
| Keller et al. (2015)                                | Structure             | Effort                 | Food              |
| Kersbergen et al. (2018)                            | Structure             | Default                | Food              |
| Kesternich et al. (2019)                            | Structure             | Default                | Environment       |
| Klotz et al. (2010)                                 | Structure             | Default                | Environment       |
| Knowles et al. (2019)                               | Structure             | Effort                 | Food              |
| Korn et al. (2018), treatment 1                     | Structure             | Consequence            | Health            |
| Korn et al. (2018), treatment 2                     | Information           | Social reference       | Health            |
| Kressel & Chapman (2007), experiment 1, treatment 1 | Structure             | Default                | Health            |
| Kressel & Chapman (2007), experiment 2              | Structure             | Default                | Health            |
| Kressel et al. (2007), treatment 1                  | Structure             | Default                | Health            |
| Kuester et al. (2015)                               | Structure             | Default                | Environment       |
| Kulendran et al. (2016)                             | Assistance            | Commitment             | Health            |
| Lalor & Hailey (1989)                               | Information           | Translation            | Health            |
| Larrick & Soll (2008), experiment 3                 | Information           | Translation            | Environment       |
| Lehmann et al. (2016)                               | Structure             | Default                | Health            |
| Libotte et al. (2014)                               | Structure             | Default                | Food              |
| Lieberman et al. (2019), experiment 4               | Information           | Translation            | Health            |
| Liu et al. (2016), treatment 1                      | Assistance            | Reminder               | Health            |
| Loeb et al. (2017)                                  | Structure             | Default                | Health            |
| Löfgren et al. (2012)                               | Structure             | Default                | Environment       |
| Loibl et al. (2018), experiment 1                   | Assistance            | Reminder               | Finance           |
| Loibl et al. (2018), experiment 2                   | Structure             | Default                | Finance           |
| Maas et al. (2011)                                  | Structure             | Effort                 | Food              |

*Note.* Unless otherwise noted, the categorizations displayed here reflect the coding of all treatment conditions and studies reported in the respective publication.

**Table S1 (continued).**

| Reference                                      | Categorization        |                        |                   |
|------------------------------------------------|-----------------------|------------------------|-------------------|
|                                                | Intervention category | Intervention technique | Behavioral domain |
| Mann & Bryant (2019)                           | Assistance            | Reminder               | Other             |
| Marchiori et al. (2012), treatment 1           | Structure             | Default                | Food              |
| Marek (2018)                                   | Structure             | Composition            | Environment       |
| Martin & Norton (2009), experiment 4           | Structure             | Composition            | Other             |
| Martins & Szrek (2019)                         | Information           | Translation            | Other             |
| McCalley & Midden (2002)                       | Assistance            | Commitment             | Environment       |
| McCaul & Kopp (1982)                           | Assistance            | Commitment             | Environment       |
| Meeker et al. (2014)                           | Assistance            | Commitment             | Health            |
| Mehta et al. (2018)                            | Structure             | Default                | Health            |
| Meng & Trudel (2017), experiment 2             | Assistance            | Reminder               | Environment       |
| Mertens et al. (2020), experiment 2            | Information           | Translation            | Environment       |
| Meyerowitz & Chaiken (1987)                    | Information           | Translation            | Health            |
| Milkman et al. (2011)                          | Assistance            | Commitment             | Health            |
| Miller et al. (2016), treatment 1              | Assistance            | Commitment             | Food              |
| Missbach & König (2016)                        | Structure             | Effort                 | Food              |
| Muñoz et al. (2017)                            | Assistance            | Reminder               | Health            |
| Narula et al. (2014)                           | Structure             | Default                | Health            |
| Neale & Bazerman (1985)                        | Information           | Translation            | Other             |
| Nelson et al. (2019)                           | Structure             | Default                | Environment       |
| Niven et al. (2019)                            | Information           | Visibility             | Food              |
| Nyer & Dellande (2010)                         | Assistance            | Commitment             | Health            |
| O'Leary et al. (2015)                          | Assistance            | Reminder               | Health            |
| Or et al. (2014)                               | Structure             | Default                | Health            |
| Paese (1995)                                   | Information           | Translation            | Other             |
| Park et al. (2010)                             | Information           | Translation            | Health            |
| Patel et al. (2018), treatment 1               | Structure             | Default                | Health            |
| Pichert & Katsikopoulos (2008), experiment 3–4 | Structure             | Default                | Environment       |
| Prinsen et al. (2013), experiment 2–3          | Information           | Social reference       | Food              |
| Privitera & Zuraikat (2014)                    | Structure             | Effort                 | Food              |
| Pugatch & Wilson (2018), treatment 1           | Assistance            | Reminder               | Other             |
| Putnam-Farr & Riis (2016)                      | Structure             | Default                | Health            |
| Raue et al. (2019)                             | Information           | Social reference       | Finance           |
| Raynor & Wing (2007), treatment 1              | Structure             | Default                | Food              |
| Raynor & Wing (2007), treatment 2              | Structure             | Composition            | Food              |
| Reiter et al. (2012)                           | Structure             | Default                | Health            |

*Note.* Unless otherwise noted, the categorizations displayed here reflect the coding of all treatment conditions and studies reported in the respective publication.

**Table S1 (continued).**

| Reference                                             | Categorization        |                        |                   |
|-------------------------------------------------------|-----------------------|------------------------|-------------------|
|                                                       | Intervention category | Intervention technique | Behavioral domain |
| Rigtering et al. (2019), experiment 1, treatment 1    | Structure             | Default                | Other             |
| Roberto et al. (2010)                                 | Information           | Visibility             | Food              |
| Rodriguez & Saavedra (2019), treatment 1–2            | Assistance            | Reminder               | Finance           |
| Rohlfs Domínguez et al. (2013)                        | Structure             | Composition            | Food              |
| Rosenkranz et al. (2017), treatment 1                 | Structure             | Effort                 | Environment       |
| Rothman et al. (1999), experiment 2                   | Information           | Translation            | Health            |
| Ruback et al. (2014), treatment 1                     | Information           | Visibility             | Finance           |
| Sacarny et al. (2018)                                 | Information           | Social reference       | Health            |
| Samek et al. (2016), treatment 2                      | Structure             | Effort                 | Other             |
| Saß et al. (2017)                                     | Structure             | Effort                 | Other             |
| Saulais et al. (2016)                                 | Assistance            | Reminder               | Food              |
| Schram & Sonnemans (2011)                             | Structure             | Composition            | Finance           |
| Schulz et al. (2018)                                  | Structure             | Default                | Pro-social        |
| Schwartz (2007)                                       | Assistance            | Reminder               | Food              |
| Schwartz et al. (2019), experiment 2, treatment 3 & 6 | Structure             | Consequence            | Other             |
| Schwartz et al. (2019), experiment 3a-3b, treatment 2 | Structure             | Consequence            | Other             |
| Sharif & Shu (2021), experiment 1                     | Structure             | Consequence            | Health            |
| Sharif & Shu (2021), experiment 2–4a                  | Structure             | Consequence            | Other             |
| Sharp & Sobal (2012)                                  | Structure             | Default                | Food              |
| Shealy & Klotz (2015)                                 | Structure             | Default                | Environment       |
| Shealy et al. (2016)                                  | Structure             | Default                | Environment       |
| Shealy et al. (2018), treatment 1                     | Information           | Social reference       | Environment       |
| Shevchenko et al. (2014)                              | Structure             | Default                | Other             |
| Shimizu et al. (2010)                                 | Assistance            | Reminder               | Food              |
| Shu et al. (2012), experiment 1 & 2                   | Assistance            | Commitment             | Pro-social        |
| Small & Loewenstein (2003)                            | Information           | Visibility             | Pro-social        |
| Sonntag & Zizzo (2015)                                | Assistance            | Reminder               | Pro-social        |
| Soon et al. (2018)                                    | Structure             | Composition            | Health            |
| Stämpfli & Brunner (2016)                             | Assistance            | Reminder               | Food              |
| Stämpfli et al. (2017), experiment 1                  | Assistance            | Reminder               | Food              |
| Steffel et al. (2016), experiment 1a–b, 2a–4          | Structure             | Default                | Other             |
| Steffel et al. (2016), experiment 1c                  | Structure             | Default                | Food              |

*Note.* Unless otherwise noted, the categorizations displayed here reflect the coding of all treatment conditions and studies reported in the respective publication.

**Table S1 (continued).**

| Reference                                                  | Categorization        |                        |                   |
|------------------------------------------------------------|-----------------------|------------------------|-------------------|
|                                                            | Intervention category | Intervention technique | Behavioral domain |
| Stephen & Lehmann (2016), experiment 1                     | Assistance            | Reminder               | Finance           |
| Stikvoort et al. (2016)                                    | Structure             | Composition            | Environment       |
| Stok et al. (2014), treatment 1                            | Information           | Social reference       | Food              |
| Tannenbaum et al. (2013), experiment 1a & 2                | Structure             | Composition            | Other             |
| Tannenbaum et al. (2013), experiment 1b                    | Structure             | Composition            | Finance           |
| Tannenbaum et al. (2013), experiment 3–4                   | Structure             | Composition            | Food              |
| Tasoff & Letzler (2014), treatment 1                       | Information           | Social reference       | Finance           |
| Tasoff & Letzler (2014), treatment 2                       | Assistance            | Reminder               | Finance           |
| Tasoff & Letzler (2014), treatment 3                       | Structure             | Effort                 | Finance           |
| Tavernier & Adam (2017)                                    | Assistance            | Reminder               | Health            |
| Taylor et al. (2015), treatment 3–4                        | Information           | Social reference       | Health            |
| Theotokis & Manganari (2015), experiment 2                 | Structure             | Default                | Environment       |
| Thorndike et al. (2016), treatment 1                       | Information           | Social reference       | Food              |
| Thunström et al. (2018)                                    | Assistance            | Reminder               | Other             |
| Treva et al. (2006)                                        | Structure             | Default                | Other             |
| Trudel et al. (2015), experiment 4                         | Assistance            | Reminder               | Food              |
| Ubel et al. (2001)                                         | Structure             | Composition            | Health            |
| Van Bavel et al. (2019)                                    | Assistance            | Reminder               | Other             |
| Van Dalen & Henkens (2014)                                 | Structure             | Default                | Pro-social        |
| Van der Zanden et al. (2015), treatment 1                  | Assistance            | Reminder               | Food              |
| Van Kleef, Otten, et al. (2012), experiment 1, treatment 1 | Structure             | Effort                 | Food              |
| Van Kleef, Otten, et al. (2012), experiment 1, treatment 2 | Structure             | Composition            | Food              |
| Van Kleef et al. (2018), experiment 2                      | Structure             | Default                | Food              |
| Van Kleef, Shimizu, et al. (2012)                          | Structure             | Default                | Food              |
| Veldwijk et al. (2016)                                     | Information           | Translation            | Health            |
| Verplanken & Weenig (1993)                                 | Information           | Translation            | Environment       |
| Wansink & Hanks (2013)                                     | Structure             | Effort                 | Food              |
| Wansink & Kim (2005)                                       | Structure             | Default                | Food              |
| Wansink & van Ittersum (2003)                              | Structure             | Default                | Food              |
| Wansink, Cardello et al. (2005)                            | Structure             | Default                | Food              |
| Wansink, Painter et al. (2005)                             | Structure             | Default                | Food              |
| Wansink et al. (2017)                                      | Structure             | Composition            | Food              |
| Wansink et al. (2006)                                      | Structure             | Default                | Food              |
| Wansink et al. (2014), experiment 1                        | Structure             | Default                | Food              |
| Xue et al. (2017), treatment 1                             | Structure             | Consequence            | Finance           |

*Note.* Unless otherwise noted, the categorizations displayed here reflect the coding of all treatment conditions and studies reported in the respective publication.

**Table S1 (continued).**

| Reference                             | Categorization        |                        |                   |
|---------------------------------------|-----------------------|------------------------|-------------------|
|                                       | Intervention category | Intervention technique | Behavioral domain |
| Yeomans & Herberich (2014)            | Information           | Social reference       | Environment       |
| Young et al. (2009), experiment 2     | Structure             | Default                | Health            |
| Zarghamee et al. (2017), experiment 1 | Structure             | Default                | Pro-social        |
| Zarghamee et al. (2017), experiment 3 | Information           | Visibility             | Pro-social        |
| Zeinstra et al. (2010)                | Structure             | Composition            | Food              |
| Zikmund-Fisher et al. (2011)          | Information           | Social reference       | Health            |
| Zuraikat et al. (2018)                | Structure             | Consequence            | Food              |

*Note.* Unless otherwise noted, the categorizations displayed here reflect the coding of all treatment conditions and studies reported in the respective publication.

**Table S2. Distribution of effect sizes across key moderators.**

| Moderator                 | % of effect sizes | Information | Structure  | Assistance | Total      |
|---------------------------|-------------------|-------------|------------|------------|------------|
| <b>Behavioral domain</b>  |                   |             |            |            |            |
| Health                    | 18.46             | 28          | 41         | 15         | 84         |
| Food                      | 24.40             | 24          | 69         | 18         | 111        |
| Environment               | 16.70             | 30          | 33         | 13         | 76         |
| Finance                   | 9.89              | 12          | 18         | 15         | 45         |
| Pro-social                | 14.51             | 23          | 27         | 16         | 66         |
| Other                     | 16.04             | 13          | 39         | 21         | 73         |
| Consumer choice           | 3.08              | 2           | 10         | 2          | 14         |
| Education                 | 1.54              | 1           | 1          | 5          | 7          |
| Organization              | 5.49              | 6           | 17         | 2          | 25         |
| Politics                  | 1.76              | 0           | 0          | 8          | 8          |
| Privacy                   | 4.18              | 4           | 11         | 4          | 19         |
| <b>Location</b>           |                   |             |            |            |            |
| Outside United States     | 40.88             | 71          | 77         | 38         | 186        |
| Inside United States      | 59.12             | 59          | 150        | 60         | 269        |
| <b>Population</b>         |                   |             |            |            |            |
| Children and adolescents  | 5.93              | 3           | 11         | 13         | 27         |
| Adults                    | 94.07             | 127         | 216        | 85         | 428        |
| <b>Type of experiment</b> |                   |             |            |            |            |
| Conventional lab          | 27.25             | 45          | 65         | 14         | 124        |
| Artefactual field         | 35.16             | 45          | 95         | 20         | 160        |
| Framed field              | 17.80             | 17          | 37         | 27         | 81         |
| Natural field             | 19.78             | 23          | 30         | 37         | 90         |
| <b>Total</b>              | <b>100.00</b>     | <b>130</b>  | <b>227</b> | <b>98</b>  | <b>455</b> |

**Table S3. Heterogeneity of effect sizes across key moderators.**

| Moderator                                 | $I^2$ <sup>a</sup> | $I^2_{(2)}$ <sup>b</sup> | $I^2_{(3)}$ <sup>c</sup> |
|-------------------------------------------|--------------------|--------------------------|--------------------------|
| Baseline                                  | 99.67              | 4.88                     | 94.79                    |
| Intervention category                     | 99.57              | 7.13                     | 92.44                    |
| Behavioral domain                         | 99.58              | 5.02                     | 94.56                    |
| Intervention category × behavioral domain | 99.52              | 7.67                     | 91.86                    |
| Study characteristics                     | 99.62              | 5.27                     | 94.35                    |
| All moderators                            | 99.53              | 7.53                     | 92.00                    |

<sup>a</sup> proportion of true to total heterogeneity

<sup>b</sup> proportion of true to total heterogeneity within publications

<sup>c</sup> proportion of true to total heterogeneity between publications

**Table S4. Effect size estimates across intervention categories in the food domain, with and without influential outliers.**

| Intervention                                 | <i>k</i> | Effect size |              | <i>t</i> | <i>P</i> |
|----------------------------------------------|----------|-------------|--------------|----------|----------|
|                                              |          | <i>d</i>    | 95% CI       |          |          |
| <i>Full sample</i>                           |          |             |              |          |          |
| Decision information                         | 24       | 0.52        | [0.20, 0.84] | 3.22     | .001     |
| Decision structure                           | 69       | 0.86        | [0.56, 1.17] | 5.54     | < .001   |
| Decision assistance                          | 18       | 0.44        | [0.28, 0.59] | 5.50     | < .001   |
| Average effect                               | 111      | 0.72        | [0.49, 0.95] | 6.16     | <.001    |
| <i>Sample excluding influential outliers</i> |          |             |              |          |          |
| Decision information                         | 24       | 0.43        | [0.18, 0.67] | 3.44     | <.001    |
| Decision structure                           | 66       | 0.74        | [0.50, 0.98] | 6.07     | <.001    |
| Decision assistance                          | 18       | 0.43        | [0.27, 0.59] | 5.37     | <.001    |
| Average effect                               | 108      | 0.62        | [0.44, 0.80] | 6.83     | < .001   |

*Note.* *k* = number of effect sizes; *t* = test of statistical difference to zero.



## 130 References

131 References marked with an asterisk (\*) indicate studies that were included in the meta-analysis.

- 132 1. AP Siddaway, AM Wood, LV Hedges, How to do a systematic review: A best practice guide for conducting and  
133 reporting narrative reviews, meta-analyses, and meta-syntheses. *Annu. Rev. Psychol.* **70**, 747–770 (2019).
- 134 2. D Moher, A Liberati, J Tetzlaff, DG Altman, The PRISMA Group, Preferred Reporting Items for Systematic  
135 Reviews and Meta-Analyses: The PRISMA statement. *PLoS Medicine* **6**, 1–6 (2009).
- 136 3. J Cohen, *Statistical power analysis for the behavioral sciences*. (Lawrence Erlbaum Associates), (1988).
- 137 4. MW Lipsey, DB Wilson, *Practical meta-analysis*. (Sage Publications Inc), (2001).
- 138 5. R Münscher, M Vetter, T Scheuerle, A review and taxonomy of choice architecture techniques. *J. Behav. Decis.*  
139 *Mak.* **29**, 511–524 (2016).
- 140 6. B Szaszi, A Palinkas, B Palfi, A Szollosi, B Aczel, A systematic scoping review of the choice architecture  
141 movement: Toward understanding when and why nudges work. *J. Behav. Decis. Mak.* **31**, 355–366 (2018).
- 142 7. J Beshears, H Kosowsky, Nudging: Progress to date and future directions. *Organ. Behav. Hum. Decis. Process.*  
143 **161**, 3–19 (2020).
- 144 8. S DellaVigna, E Linos, RCTs to scale: Comprehensive evidence from two nudge units, (National Bureau of  
145 Economic Research), Working Paper 27594 (2020).
- 146 9. D Hummel, A Maedche, How effective is nudging? A quantitative review on the effect sizes and limits of  
147 empirical nudging studies. *J. Behav. Exp. Econ.* **80**, 47–58 (2019).
- 148 10. GW Harrison, JA List, Field experiments. *J. Econ. Lit.* **42**, 1009–1055 (2004).
- 149 11. W Viechtbauer, Conducting meta-analyses in R with the metafor package. *J. Stat. Softw.* **36**, 1–48 (2010).
- 150 12. AC Cameron, DL Miller, A practitioner’s guide to cluster-robust inference. *J. Hum. Resour.* **50**, 317–372 (2015).
- 151 13. LV Hedges, E Tipton, MC Johnson, Robust variance estimation in meta-regression with dependent effect size  
152 estimates. *Res. Synth. Methods* **1**, 39–65 (2010).
- 153 14. J Cohen, P Cohen, SG West, LS Aiken, *Applied multiple regression/correlation analysis for the behavioral*  
154 *sciences*. (Lawrence Erlbaum Associates), 3 edition, (2003).
- 155 15. J Fox, *Regression diagnostics*. (Sage Publications Inc), (1991).
- 156 16. \*PR Domínguez, et al., Providing choice increases children’s vegetable intake. *Food Qual. Prefer.* **30**, 108–113  
157 (2013).
- 158 17. \*N Diliberti, PL Bordi, MT Conklin, LS Roe, BJ Rolls, Increased portion size leads to increased energy intake  
159 in a restaurant meal. *Obes. Res.* **12**, 562–568 (2004).
- 160 18. \*P Abhyankar, BA Summers, G Velikova, HL Bekker, Framing options as choice or opportunity: Does the  
161 frame influence decisions? *Med. Decis. Mak.* **34**, 567–582 (2014).
- 162 19. \*J Alemany, E de Val, J Alberola, A García-Fornes, Enhancing the privacy risk awareness of teenagers in online  
163 social networks through soft-paternalism mechanisms. *Int. J. Human-Computer Stud.* **129**, 27–40 (2019).
- 164 20. \*S Alinia, et al., A workplace feasibility study of the effect of a minimal fruit intervention on fruit intake. *Public*  
165 *Heal. Nutr.* **14**, 1382–1387 (2011).
- 166 21. \*C Ansher, et al., Better medicine by default. *Med. Decis. Mak.* **34**, 147–158 (2013).
- 167 22. \*B Antonuk, LG Block, The effect of single serving versus entire package nutritional information on consumption  
168 norms and actual consumption of snack food. *J. Nutr. Educ. Behav.* **38**, 365–370 (2006).
- 169 23. \*S Anzman-Frasca, et al., Effects of a randomized intervention promoting healthy children’s meals on children’s  
170 ordering and dietary intake in a quick-service restaurant. *Physiol. & Behav.* **192**, 109–117 (2018).
- 171 24. \*JE Araña, CJ León, Can defaults save the climate? evidence from a field experiment on carbon offsetting  
172 programs. *Environ. Resour. Econ.* **54**, 613–626 (2013).
- 173 25. \*W Bachman, R Katzev, The effects of non-contingent free bus tickets and personal commitment on urban bus  
174 ridership. *Transp. Res. Part A: Gen.* **16**, 103–108 (1982).
- 175 26. \*L Bacon, D Krpan, (not) eating for the environment: The impact of restaurant menu design on vegetarian  
176 food choice. *Appetite* **125**, 190–200 (2018).
- 177 27. \*YM Baek, Y Bae, I Jeong, E Kim, JW Rhee, Changing the default setting for information privacy protection:  
178 What and whose personal information can be better protected? *The Soc. Sci. J.* **51**, 523–533 (1982).
- 179 28. \*S Bamberg, Effects of implementation intentions on the actual performance of new environmentally friendly  
180 behaviours – results of two field experiments. *J. Environ. Psychol.* **22**, 399–411 (2002).
- 181 29. \*SM Banks, et al., The effects of message framing on mammography utilization. *Heal. Psychol.* **14**, 178–184  
182 (1995).
- 183 30. \*AJ Barnes, M Karpman, SK Long, Y Hanoch, T Rice, More intelligent designs: Comparing the effectiveness  
184 of choice architectures in US health insurance marketplaces. *Organ. Behav. Hum. Decis. Process.* **163**, 142–164

- (2021).
- 185 31. \*S Bartke, A Friedl, F Gelhaar, L Reh, Social comparison nudges – guessing the norm increases charitable  
186 giving. *Econ. Lett.* **152**, 73–75 (2017).
  - 187 32. \*S Basu, K Savani, Choosing one at a time? presenting options simultaneously helps people make more optimal  
188 decisions than presenting options sequentially. *Organ. Behav. Hum. Decis. Process.* **139**, 76–91 (2017).
  - 189 33. \*Behavioural Economics Team of the Australian Government, Effective use of SMS: Improving government  
190 confirmation processes (2017).
  - 191 34. \*Behavioural Economics Team of the Australian Government, Energy labels that make cents: Testing energy  
192 rating labels on appliances sold online (2018).
  - 193 35. \*Behavioural Economics & Research Team, Behavioural Economics Team of the Australian Government, Nudge  
194 vs superbugs: A behavioural economics trial to reduce the overprescribing of antibiotics (2018).
  - 195 36. \*Behavioural Economics Team of the Australian Government, Credit when it's due: Timely reminders help  
196 consumers reduce their credit card debt (2019).
  - 197 37. \*Behavioural Insights Team, Applying behavioural insights to organ donation: Preliminary results from a  
198 randomised controlled trial (2013).
  - 199 38. \*S Bergeron, M Doyon, L Saulais, J Labrecque, Using insights from behavioral economics to nudge individuals  
200 towards healthier choices when eating out: A restaurant experiment. *Food Qual. Prefer.* **73**, 56–64 (2019).
  - 201 39. \*SP Bhanot, Cheap promises: Evidence from loan repayment pledges in an online experiment. *J. Econ. Behav.*  
202 *& Organ.* **140**, 246–266 (2017).
  - 203 40. \*F Bogliacino, IA Parra Forero, Behaviourally designed treatments that increase willingness to treatment from  
204 families with children suffering from autism spectrum disorder. *J. Epidemiol. & Community Heal.* **69**, 958–962  
205 (2015).
  - 206 41. \*R Böhm, MMP Theelen, Outcome valence and externality valence framing in public good dilemmas. *J. Econ.*  
207 *Psychol.* **54**, 151–163 (2016).
  - 208 42. \*I Bohnet, A van Geen, M Bazerman, When performance trumps gender bias: Joint vs. separate evaluation.  
209 *Manag. Sci.* **62**, 1225–1234 (2016).
  - 210 43. \*M Broman Toft, G Schuitmea, J Thøgersen, The importance of framing for consumer acceptance of the Smart  
211 Grid: A comparative study of Denmark, Norway and Switzerland. *Energy Res. & Soc. Sci.* **3**, 113–123 (2014).
  - 212 44. \*ET Bronchetti, TS Dee, DB Huffman, E Magenheimer, When a nudge isn't enough: Defaults and saving among  
213 low-income tax filers, (National Bureau of Economic Research), Working paper 16887 (2011).
  - 214 45. \*R Brook, M Servátka, The anticipatory effect of nonverbal communication. *Econ. Lett.* **144**, 45–48 (2016).
  - 215 46. \*H Bruns, E Kantorowicz-Reznichenko, K Klement, M Luistro Jonsson, B Rahali, Can nudges be transparent  
216 and yet effective? *J. Econ. Psychol.* **65**, 41–59 (2018).
  - 217 47. \*T Bucher, M Siegrist, K van der Horst, Vegetable variety: An effective strategy to increase vegetable choice in  
218 children. *Public Heal. Nutr.* **17**, 1232–1236 (2014).
  - 219 48. \*RJ Burns, AJ Rothman, Offering variety: A subtle manipulation to promote healthy food choice throughout  
220 the day. *Heal. Psychol.* **34**, 566–570 (2015).
  - 221 49. \*K Byrd, B Almanza, RF Ghiselli, C Behnke, HA Eicher-Miller, Adding sodium information to casual dining  
222 restaurant menus: Beneficial or detrimental for consumers? *Appetite* **125**, 474–485 (2018).
  - 223 50. \*AR Camilleri, RP Larrick, Metric and scale design as choice architecture tools. *J. Public Policy & Mark.* **33**,  
224 108–125 (2014).
  - 225 51. \*V Capraro, G Jagfeld, R Klein, M Mul, I van de Pol, What's the right thing to do? increasing pro-sociality  
226 with simple moral nudges, Working paper (2011).
  - 227 52. \*M Carrera, H Royer, M Stehr, J Sydnor, D Taubinsky, The limits of simple implementation intentions:  
228 Evidence from a field experiment on making plans to exercise. *J. Heal. Econ.* **62**, 95–104 (2018).
  - 229 53. \*KA Carroll, A Samek, L Zepeda, Food bundling as a health nudge: Investigating consumer fruit and vegetable  
230 selection using behavioral economics. *Appetite* **121**, 237–248 (2018).
  - 231 54. \*KA Carter, C González-Vallejo, Nutrient-specific system versus full fact panel: Testing the benefits of  
232 nutrient-specific front-of-package labels in a student sample. *Appetite* **125**, 512–526 (2018).
  - 233 55. \*BL Castleman, LC Page, Summer nudging: Can personalized text messages and peer mentor outreach increase  
234 college going among low-income high school graduates? *J. Econ. Behav. & Organ.* **115**, 144–160 (2015).
  - 235 56. \*BL Castleman, LC Page, Freshman year financial aid nudges: An experiment to increase FAFSA renewal and  
236 college persistence. *J. Hum. Resour.* **51**, 389–415 (2016).
  - 237 57. \*JR Catlin, Y Wang, Recycling gone bad: When the option to recycle increases resource consumption. *J.*  
238 *Consumer Psychol.* **23**, 122–127 (2013).
  - 239 58. \*GB Chapman, M Li, H Colby, H Yoon, Opting in vs opting out of influenza vaccination. *JAMA* **304**, 43–44  
240

- (2010).
59. \*J Chen, D Houser, N Montinari, M Piovesan, Beware of popular kids bearing gifts: A framed field experiment. *J. Econ. Behav. & Organ.* **132**, 104–120 (2016).
60. \*TTL Cheung, FM Kroese, BM Fennis, DTD De Ridder, The hunger games: Using hunger to promote healthy choices in self-control conflicts. *Appetite* **116**, 401–409 (2017).
61. \*EY Chou, JK Murnighan, Life or death decisions: Framing the call for help. *PLoS ONE* **8**, 1–6 (2013).
62. \*KR Courtright, et al., A randomized trial of expanding choice sets to motivate advance directive completion. *Med. Decis. Mak.* **37**, 544–554 (2017).
63. \*LM Coventry, D Jeske, JM Blythe, J Turland, P Briggs, Personality and social framing in privacy decision-making: A study on cookie acceptance. *Front. Psychol.* **7**, 1–12 (2016).
64. \*G d’Adda, V Capraro, M Tavoni, Push, don’t nudge: Behavioral spillovers and policy instruments. *Econ. Lett.* **154**, 92–95 (2017).
65. \*MT Damgaard, C Gravert, The hidden costs of nudging: Experimental evidence from reminders in fundraising. *J. Public Econ.* **157**, 15–26 (2018).
66. \*VWT de Wild, C de Graaf, HC Boshuizen, G Jager, Influence of choice on vegetable intake in children: An in-home study. *Appetite* **91**, 1–6 (2015).
67. \*C Demarque, L Charalambides, DJ Hilton, L Waroquier, Nudging sustainable consumption: The use of descriptive norms to promote a minority behavior in a realistic online shopping environment. *J. Environ. Psychol.* **43**, 166–174 (2015).
68. \*CA Dickerson, R Thibodeau, E Aronson, D Miller, Using cognitive dissonance to encourage water conservation. *J. Appl. Soc. Psychol.* **22**, 841–854 (1992).
69. \*I Dinner, EJ Johnson, DG Goldstein, K Liu, Partitioning default effects: Why people choose not to choose. *J. Exp. Psychol. Appl.* **17**, 332–341 (2011).
70. \*L Dogruel, S Joeckel, J Vitak, The valuation of privacy premium features for smartphone apps: The influence of defaults and expert recommendations. *Comput. Hum. Behav.* **77**, 230–239 (2017).
71. \*Q dos Santos, et al., Impact of a nudging intervention and factors associated with vegetable dish choice among european adolescents. *Eur. J. Nutr.* **59**, 231–247 (2020).
72. \*F Ebeling, S Lotz, Domestic uptake of green energy promoted by opt-out tariffs. *Nat. Clim. Chang.* **5**, 868–871 (2015).
73. \*D Engell, M Kramer, T Malafi, M Salomon, L Leshner, Effects of effort and social modeling on drinking in humans. *Appetite* **26**, 129–138 (1996).
74. \*AM Evans, KD Dillon, G Goldin, JI Krueger, Trust and self-control: The moderating role of the default. *Judgm. Decis. Mak.* **6**, 697–705 (2011).
75. \*JAC Everett, L Caviola, G Kahane, J Savulescu, NS Faber, Doing good by doing nothing? the role of social norms in explaining default effects in altruistic contexts. *Eur. J. Soc. Psychol.* **45**, 230–241 (2015).
76. \*V Faralla, M Novarese, A Ardizzone, Framing effects in intertemporal choice: A nudge experiment. *J. Behav. Exp. Econ.* **71**, 13–25 (2017).
77. \*J Firmino-Machado, S Varela, R Mendes, A Moreira, N Lunet, Stepwise strategy to improve cervical cancer screening adherence (SCAN-Cervical Cancer) – automated text messages, phone calls and reminders: Population based randomized controlled trial. *Prev. Medicine* **114**, 123–133 (2018).
78. \*G Fisher, Nutrition labeling reduces valuations of food through multiple health and taste channels. *Appetite* **120**, 500–504 (2018).
79. \*C Frydman, A Rangel, Debiasing the disposition effect by reducing the saliency of information about a stock’s purchase price. *J. Econ. Behav. & Organ.* **107**, 541–552 (2014).
80. \*S Furnell, W Khern-am nuai, R Esmael, W Yang, N Li, Enhancing security behaviour by supporting the user. *Comput. & Secur.* **75**, 1–9 (2018).
81. \*Y Ganzach, N Karsahi, Message framing and buying behavior: A field experiment. *J. Bus. Res.* **32**, 11–17 (1995).
82. \*M Gärtner, The prosociality of intuitive decisions depends on the status quo. *J. Behav. Exp. Econ.* **74**, 127–138 (2018).
83. \*A Geier, B Wansink, P Rozin, Red potato chips: Segmentation cues can substantially decrease food intake. *Heal. Psychol.* **31**, 398–401 (2012).
84. \*MA Gerend, Does calorie information promote lower calorie fast food choices among college students? *J. Adolesc. Heal.* **44**, 84–86 (2009).
85. \*NJ Goldstein, V Griskevicius, RB Cialdini, Reciprocity by proxy: A novel influence strategy for stimulating cooperation. *Adm. Sci. Q.* **56**, 441–473 (2011).

- 297 86. \*L Goldzahl, G Hollard, F Jusot, Increasing breast-cancer screening uptake: A randomized controlled experiment.  
298 *J. Heal. Econ.* **58**, 228–252 (2018).
- 299 87. \*Y Gomez, V Martínez-Molés, A Urbano, J Vila, The attraction effect in mid-involvement categories: An  
300 experimental economics approach. *J. Bus. Res.* **69**, 5082–5088 (2016).
- 301 88. \*M Gong, et al., Testing the scenario hypothesis: An experimental comparison of scenarios and forecasts for  
302 decision support in a complex decision environment. *Environ. Model. & Softw.* **91**, 135–155 (2017).
- 303 89. \*A Gopalan, et al., Translating the hemoglobin a1c with more easily understood feedback: A randomized  
304 controlled trial. *J. Gen. Intern. Medicine* **29**, 996–1003 (2014).
- 305 90. \*I Goswami, O Urminsky, When should the ask be a nudge? the effect of default amounts on charitable  
306 donations. *J. Mark. Res.* **53**, 829–846 (2016).
- 307 91. \*C Grant, J Kaler, E Ferguson, H O’Kane, LE Green, A comparison of the efficacy of three intervention trial  
308 types: postal, group, and one-to-one facilitation, prior management and the impact of message framing and  
309 repeat messages on the flock prevalence of lameness in sheep. *Prev. Vet. Medicine* **149**, 82–91 (2018).
- 310 92. \*KA Grépin, J Habyarimana, W Jack, Cash on delivery: Results of a randomized experiment to promote  
311 maternal health care in kenya. *J. Heal. Econ.* **65**, 15–30 (2019).
- 312 93. \*J Hainmueller, et al., A randomized controlled design reveals barriers to citizenship for low-income immigrants.  
313 *PNAS* **115**, 939–944 (2018).
- 314 94. \*M Hallsworth, et al., Stating appointment costs in sms reminders reduces missed hospital appointments:  
315 Findings from two randomised controlled trials. *PLoS ONE* **10**, 1–14 (2015).
- 316 95. \*SD Halpern, et al., Default options in advance directives influence how patients set goals for end-of-life care.  
317 *Heal. Aff.* **32**, 408–417 (2013).
- 318 96. \*MJJ Handgraaf, MA Van Lidth de Jeude, KC Appelt, Public praise vs private pay: Effects of rewards on  
319 energy conservation in the workplace. *Ecol. Econ.* **86**, 86–92 (2013).
- 320 97. \*LJ Harnack, et al., Effects of calorie labeling and value size pricing on fast food meal choices: Results from an  
321 experimental trial. *Int. J. Behav. Nutr. Phys. Activity* **5**, 1–13 (2008).
- 322 98. \*MF Haward, RO Murphy, JM Lorenz, Default options and neonatal resuscitation decisions. *J. Med. Ethics* **38**,  
323 713–718 (2012).
- 324 99. \*S Hedlin, CR Sunstein, Does active choosing promote green energy use? experimental evidence. *Ecol. Law Q.*  
325 **43**, 107–142 (2016).
- 326 100. \*HE Hershfield, HM Bang, EU Weber, National differences in environmental concern and performance are  
327 predicted by country age. *Psychol. Sci.* **25**, 152–160 (2014).
- 328 101. \*D Hilton, L Charalambides, C Demarque, L Waroquier, C Raux, A tax can nudge: The impact of an  
329 environmentally motivated bonus/malus fiscal system on transport preferences. *J. Econ. Psychol.* **42**, 17–27  
330 (2014).
- 331 102. \*J Hou, Can interface cues nudge modeling of food consumption? experiments on a food-ordering website. *J.*  
332 *Comput. Commun.* **22**, 196–214 (2017).
- 333 103. \*S Hu, Z Li, J Zhang, J Zhu, Engaging scientists in science communication: The effect of social proof and  
334 meaning. *J. Clean. Prod.* **170**, 1044–1051 (2018).
- 335 104. \*Impact and Innovation Unit, Using behavioural insights to encourage charitable donations (2018).
- 336 105. \*ET Isaksen, KA Brekke, A Richter, Positive framing does not solve the tragedy of the commons. *J. Environ.*  
337 *Econ. Manag.* **95**, 45–56 (2019).
- 338 106. \*L Jin, Improving response rates in web surveys with default setting: The effects of default on web survey  
339 participation and permission. *Int. J. Mark. Res.* **53**, 75–94 (2011).
- 340 107. \*EJ Johnson, J Hershey, J Meszaros, H Kunreuther, Framing, probability distortions, and insurance decisions.  
341 *J. Risk Uncertain.* **7**, 35–51 (1993).
- 342 108. \*EJ Johnson, S Bellman, GL Lohse, Defaults, framing and privacy: Why opting in-opting out. *Mark. Lett.* **13**,  
343 5–15 (2002).
- 344 109. \*EJ Johnson, DG Goldstein, Do defaults save lives? *Science* **302**, 1338–1339 (2003).
- 345 110. \*AW Johnston, et al., Just a nudge: Applying behavioral incentives to engage residents in quality improvement  
346 education. *J. Am. Coll. Surg.* **227**, 219–220 (2018).
- 347 111. \*M Junger, M L, FJ Overink, Priming and warnings are not effective to prevent social engineering attacks.  
348 *Comput. Hum. Behav.* **66**, 75–87 (2017).
- 349 112. \*C Keller, F Markert, T Bucher, Nudging product choices: The effect of position change on snack bar choice.  
350 *Food Qual. Prefer.* **41**, 41–43 (2015).
- 351 113. \*PA Keller, B Harlam, G Loewenstein, KG Volpp, Enhanced active choice: A new method to motivate behavior  
352 change. *J. Consumer Psychol.* **21**, 376–383 (2011).



- 353 114. \*I Kersbergen, et al., Reducing the standard serving size of alcoholic beverages prompts reductions in alcohol  
354 consumption. *Addiction* **113**, 1598–1608 (2018).
- 355 115. \*M Kesternich, D Römer, F Flues, The power of active choice: Field experimental evidence on repeated  
356 contribution decisions to a carbon offsetting program. *Eur. Econ. Rev.* **114**, 76–91 (2019).
- 357 116. \*L Klotz, D Mack, B Klaphor, C Tunstall, J Harrison, Unintended anchors: Building rating systems and  
358 energy performance goals for U.S. buildings. *Energy Policy* **38**, 3557–3566 (2010).
- 359 117. \*D Knowles, K Brown, S Aldrovandi, Exploring the underpinning mechanisms of the proximity effect within a  
360 competitive food environment. *Appetite* **134**, 94–102 (2019).
- 361 118. \*L Korn, C Betsch, R Böhm, NW Meier, Social nudging: The effect of social feedback interventions on vaccine  
362 uptake. *Heal. Psychol.* **37**, 1045–1054 (2018).
- 363 119. \*LM Kressel, GB Chapman, The default effect in end-of-life medical treatment preferences. *Med. Decis. Mak.*  
364 **27**, 299–310 (2007).
- 365 120. \*LM Kressel, GB Chapman, E Leventhal, The influence of default options on the expression of end-of-life  
366 treatment preferences in advance directives. *J. Gen. Intern. Medicine* **22**, 1007–1010 (2007).
- 367 121. \*S Kuester, SC Hess, A Hermann, The role of defaults in preventing innovation rejection. *Int. J. Innov. Manag.*  
368 **19**, 1550023 (2015).
- 369 122. \*M Kulendran, et al., The use of commitment techniques to support weight loss maintenance in obese adolescents.  
370 *Psychol. & Heal.* **31**, 1332–1341 (2016).
- 371 123. \*KM Lalor, BJ Hailey, The effects of message framing and feelings of susceptibility to breast cancer on reported  
372 frequency of breast self-examination. *Int. Q. Community Heal. Educ.* **10**, 183–192 (1989).
- 373 124. \*RP Larrick, JB Soll, The mpg illusion. *Science* **320**, 1593–1594 (2008).
- 374 125. \*BA Lehmann, GB Chapman, FME Franssen, G Kok, RAC Ruiter, Changing the default to promote influenza  
375 vaccination among health care workers. *Vaccine* **34**, 1389–1392 (2016).
- 376 126. \*E Libotte, M Siegrist, T Bucher, The influence of plate size on meal composition. literature review and  
377 experiment. *Appetite* **82**, 91–96 (2014).
- 378 127. \*A Lieberman, KE Duke, O Amir, How incentive framing can harness the power of social norms. *Organ. Behav.*  
379 *Hum. Decis. Process.* **151**, 118–131 (2019).
- 380 128. \*CW Liu, R Agarwal, G Gao, The dark side of positive social influence, (129), pp. 1–14 (2016).
- 381 129. *Proceedings of the 37th International Conference on Information Systems* (Association for Information Systems),  
382 (2016).
- 383 130. \*KL Loeb, et al., The application of defaults to optimize parents' health-based choices for children. *Appetite*  
384 **113**, 368–375 (2017).
- 385 131. \*A Löfgren, P Martinsson, M Hennlock, T Sterner, Are experienced people affected by a pre-set default option  
386 — results from a field experiment. *J. Environ. Econ. Manag.* **63**, 66–72 (2012).
- 387 132. \*C Loibl, L Jones, E Haisley, Testing strategies to increase saving in individual development account programs.  
388 *J. Econ. Psychol.* **66**, 45–63 (2018).
- 389 133. \*J Maas, DTD de Ridder, E de Vet, JBF de Wit, Do distant foods decrease intake? the effect of food accessibility  
390 on consumption. *Psychol. & Heal.* **27**, 59–73 (2012).
- 391 134. \*CB Mann, LA Bryant, If you ask, they will come (to register and vote): Field experiments with state election  
392 agencies on encouraging voter registration. *Electorial Stud.* **63**, 1–10 (2020).
- 393 135. \*D Marchiori, O Corneille, O Klein, Container size influences snack food intake independently of portion size.  
394 *Appetite* **58**, 814–817 (2012).
- 395 136. \*EM Marek, Social learning under the labeling effect: Exploring travellers' behavior in social dilemmas. *Transp.*  
396 *Res. Part F: Traffic Psychol. Behav.* **58**, 511–527 (2018).
- 397 137. \*H Marreiros, M Tonin, M Vlassopoulos, MC Schraefel, "now that you mention it": A survey experiment on  
398 information, inattention and online privacy. *J. Econ. Behav. & Organ.* **140**, 1–17 (2017).
- 399 138. \*JM Martin, MI Norton, Shaping online consumer choice by partitioning the web. *Psychol. & Mark.* **26**, 908–926  
400 (2009).
- 401 139. \*L Martins, H Szrek, The impact of the decision environment on consumer choice of mobile service plans: An  
402 experimental examination. *Util. Policy* **56**, 20–32 (2019).
- 403 140. \*LT McCalley, CJH Midden, Energy conservation through product-integrated feedback: The roles of goal-setting  
404 and social orientation. *J. Econ. Psychol.* **23**, 589–603 (2002).
- 405 141. \*KD McCaul, JT Kopp, Effects of goal setting and commitment on increasing metal recycling. *J. Appl. Psychol.*  
406 **67**, 377–379 (1982).
- 407 142. \*D Meeker, et al., Nudging guideline-concordant antibiotic prescribing: A randomized clinical trial. *JAMA*  
408 *Intern. Medicine* **174**, 425–431 (2014).

- 409 143. \*SJ Mehta, et al., A randomized controlled trial of opt-in versus opt-out colorectal cancer screening outreach.  
410 *The Am. J. Gastroenterol.* **113**, 1848–1854 (2018).
- 411 144. \*MD Meng, R Trudel, Using emoticons to encourage students to recycle. *The J. Environ. Educ.* **48**, 196–204  
412 (2017).
- 413 145. \*S Mertens, UJJ Hahnel, T Brosch, This way, please: Uncovering the directional effects of attribute translations  
414 on decision making. *Judgm. Decis. Mak.* **15**, 25–46 (2020).
- 415 146. \*BE Meyerowitz, S Chaiken, The effect of message framing on breast self-examination attitudes, intentions,  
416 and behavior. *J. Pers. Soc. Psychol.* **52**, 500–510 (1987).
- 417 147. \*KL Milkman, J Beshears, JJ Choi, D Laibson, BC Madrian, Using implementation intentions prompts to  
418 enhance influenza vaccination rates. *PNAS* **108**, 10415–10420 (2011).
- 419 148. \*GF Miller, S Gupta, JD Kropp, KA Grogan, A Mathews, The effects of pre-ordering and behavioral nudges  
420 on National School Lunch Program participants' food item selection. *J. Econ. Psychol.* **55**, 4–16 (2016).
- 421 149. \*B Missbach, JS König, Middle choice preference and snack choice: The role of self-regulatory resources to  
422 nudge healthier food choice. *Food Qual. Prefer.* **53**, 127–131 (2016).
- 423 150. \*RF Muñoz, Y Leykin, AZ Barrera, CH Brown, EL Bunge, The impact of phone calls on follow-up rates in an  
424 online depression prevention study. *Internet Interv.* **8**, 10–14 (2017).
- 425 151. \*T Narula, C Ramprasad, EN Ruggs, MR Hebl, Increasing colonoscopies? a psychological perspective on opting  
426 in versus opting out. *Heal. Psychol.* **33**, 1426–1429 (2014).
- 427 152. \*MA Neale, MH Bazerman, The effects of framing and negotiator overconfidence on bargaining behaviors and  
428 outcomes. *Acad. Manag. J.* **28**, 34–49 (1985).
- 429 153. \*KM Nelson, S Partelow, A Schlüter, Nudging tourists to donate for conservation: Experimental evidence on  
430 soliciting voluntary contributions for coastal management. *J. Environ. Manag.* **237**, 30–43 (2019).
- 431 154. \*P Niven, et al., Effects of health star labelling on the healthiness of adults' fast food meal selections: An  
432 experimental study. *Appetite* **136**, 146–153 (2019).
- 433 155. \*PU Nyer, S Dellande, Public commitment as a motivator for weight loss. *Psychol. & Mark.* **27**, 1–12 (2010).
- 434 156. \*ST O'Leary, et al., Effectiveness and cost of bidirectional text messaging for adolescent vaccines and well care.  
435 *Pediatrics* **136**, 1220–1227 (2015).
- 436 157. \*A Or, Y Baruch, S Tadger, Y Barak, Real-life decision making of serious mental illness patients: Opt-in and  
437 opt-out research participation. *The Isr. J. Psychiatry Relat. Sci.* **51**, 199–203 (2014).
- 438 158. \*PW Paese, Effects of framing on actual time allocation decisions. *Organ. Behav. Hum. Decis. Process.* **61**,  
439 67–76 (1995).
- 440 159. \*P Park, RK Simmons, AT Prevost, SJ Griffin, A randomized evaluation of loss and gain frames in an invitation  
441 to screening for Type 2 diabetes: Effects on attendance, anxiety and self-rated health. *J. Heal. Psychol.* **15**,  
442 196–204 (2010).
- 443 160. \*MS Patel, et al., Effect of an automated patient dashboard using active choice and peer comparison performance  
444 feedback to physicians on Statin prescribing: The PRESCRIBE cluster randomized clinical trial. *JAMA Netw.*  
445 *Open* **1**, 1–11 (2018).
- 446 161. \*D Pichert, KV Katsikopoulos, Green defaults: Information presentation and pro-environmental behaviour. *J.*  
447 *Environ. Psychol.* **28**, 63–73 (2008).
- 448 162. \*MC Porter, JE Heyman, We've shopped before: Exploring instructions as an influence on mystery shopper  
449 reporting. *J. Retail. Consumer Serv.* **45**, 12–20 (2018).
- 450 163. \*S Prinsen, DTD de Ridder, E de Vet, Eating by example. effects of environmental cues on dietary decisions.  
451 *Appetite* **70**, 1–5 (2013).
- 452 164. \*GJ Privitera, FM Zuraikat, Proximity of foods in a competitive food environment influences consumption of a  
453 low calorie and a high calorie food. *Appetite* **76**, 175–179 (2014).
- 454 165. \*T Pugatch, N Wilson, Nudging study habits: A field experiment on peer tutoring in higher education. *Econ.*  
455 *Educ. Rev.* **62**, 151–161 (2018).
- 456 166. \*E Putnam-Farr, J Riis, "yes/no/not right now": Yes/no response formats can increase response rates even in  
457 non-forced-choice settings. *J. Mark. Res.* **53**, 424–432 (2016).
- 458 167. \*M Raue, LA D'Ambrosio, JF Coughlin, The power of peers: Prompting savings behavior through social  
459 comparison. *J. Behav. Finance* **21**, 1–13 (2020).
- 460 168. \*HA Raynor, RR Wing, Package unit size and amount of food: Do both influence intake? *Obesity* **15**, 2311–2319  
461 (2007).
- 462 169. \*PL Reiter, AL McRee, JK Pepper, NT Brewer, Default policies and parents' consent for school-located HPV  
463 vaccination. *J. Behav. Medicine* **35**, 651–657 (2012).
- 464 170. \*JPC Rigtering, GU Weitzel, K Muehlfeld, Increasing quantity without compromising quality: How managerial

- 465 framing affects intrapreneurship. *J. Bus. Ventur.* **34**, 224–241 (2019).
- 466 171. \*CA Roberto, PD Larsen, H Agnew, J Baik, KD Brownell, Evaluating the impact of menu labeling on food  
467 choices and intake. *Am. J. Public Heal.* **100**, 312–318 (2010).
- 468 172. \*C Rodriguez, JE Saavedra, The persistent effects of youth savings reminders: Experimental evidence from  
469 text-message campaigns in Colombia. *J. Dev. Econ.* **139**, 135–156 (2019).
- 470 173. \*S Rosenkranz, et al., Using behavioral insights to make firms more energy efficient: A field experiment on the  
471 effects of improved communication. *Energy Policy* **108**, 184–193 (2017).
- 472 174. \*AJ Rothman, SC Martino, BT Bedell, JB Detweiler, P Salovey, The systematic influence of gain-and-loss-  
473 framed messages on interest in and use of different types of health behavior. *Pers. Soc. Psychol. Bull.* **25**,  
474 1355–1369 (1999).
- 475 175. \*RB Ruback, AS Gladfelter, B Lantz, Paying restitution: Experimental analysis of the effects of information  
476 and rationale. *Criminol. & Public Policy* **13**, 405–436 (2014).
- 477 176. \*A Sacarny, et al., Effect of peer comparison letters for high-volume primary care prescribers of quetiapine in  
478 older and disabled adults. *JAMA Psychiatry* **75**, 1003–1011 (2018).
- 479 177. \*A Sallis, H Harper, M Sanders, Effect of persuasive messages on National Health Service organ donor  
480 registrations: A pragmatic quasi-randomised controlled trial with one million UK road taxpayers. *Trials* **19**,  
481 1–10 (2018).
- 482 178. \*A Samek, I Hur, SH Kim, JS Yi, An experimental study of the decision process with interactive technology. *J.*  
483 *Econ. Behav. & Organ.* **130**, 20–32 (2016).
- 484 179. \*S Saß, K Schütte, MA Lindner, Test-takers' eye movements: Effects of integration aids and types of graphical  
485 representation. *Comput. & Educ.* **109**, 85–97 (2017).
- 486 180. \*L Saulais, et al., When are "Dish of the Day" nudges most effective to increase vegetable selection? *Food*  
487 *Policy* **85**, 15–27 (2019).
- 488 181. \*A Schram, J Sonnemans, How individuals choose health insurance: An experimental analysis. *Eur. Econ. Rev.*  
489 **55**, 799–819 (2011).
- 490 182. \*JF Schulz, P Thiemann, C Thöni, Nudging generosity: Choice architecture and cognitive factors in charitable  
491 giving. *J. Behav. Exp. Econ.* **74**, 139–145 (2018).
- 492 183. \*D Schwartz, EA Keenan, A Imas, A Gneezy, Opting-in to prosocial incentives. *Organ. Behav. Hum. Decis.*  
493 *Process.* **163**, 132–141 (2021).
- 494 184. \*MB Schwartz, The influence of a verbal prompt on school lunch fruit consumption: A pilot study. *Int. J.*  
495 *Behav. Nutr. Phys. Activity* **4**, 1–5 (2007).
- 496 185. \*MA Sharif, SB Shu, Nudging persistence after failure through emergency reserves. *Organ. Behav. Hum. Decis.*  
497 *Process.* **163**, 17–29 (2021).
- 498 186. \*D Sharp, J Sobal, Using plate mapping to examine sensitivity to plate size in food portions and meal  
499 composition among college students. *Appetite* **59**, 639–645 (2012).
- 500 187. \*T Shealy, L Klotz, Well-endowed rating systems: How modified defaults can lead to more sustainable  
501 performance. *J. Constr. Eng. Manag.* **141**, 1–8 (2015).
- 502 188. \*T Shealy, et al., Providing descriptive norms during engineering design can encourage more sustainable  
503 infrastructure. *Sustain. Cities Soc.* **40**, 182–188 (2018).
- 504 189. \*T Shealy, L Klotz, EU Weber, EJ Johnson, RG Bell, Using framing effects to inform more sustainable  
505 infrastructure design decisions. *J. Constr. Eng. Manag.* **142**, 1–9 (2016).
- 506 190. \*Y Shevchenko, B von Helversen, B Scheibehenne, Change and status quo in decisions with defaults: The effect  
507 of incidental emotions depends on the type of default. *Judgm. Decis. Mak.* **9**, 287–296 (2014).
- 508 191. \*M Shimizu, CR Payne, B Wansink, When snacks become meals: How hunger and environmental cues bias  
509 food intake. *Int. J. Behav. Nutr. Phys. Activity* **7**, 1–6 (2010).
- 510 192. \*LL Shu, N Mazar, F Gino, D Ariely, MH Bazerman, Signing at the beginning makes ethics salient and decreases  
511 dishonest self-reports in comparison to signing at the end. *PNAS* **109**, 15197–15200 (2012).
- 512 193. \*DA Small, G Loewenstein, Helping a victim or helping the victim: Altruism and identifiability. *J. Risk*  
513 *Uncertain.* **26**, 5–16 (2003).
- 514 194. \*A Sonntag, DJ Zizzo, On reminder effects, drop-outs and dominance: Evidence from an online experiment on  
515 charitable giving. *PLoS ONE* **10**, 1–17 (2015).
- 516 195. \*J Soon, et al., Effect of two behavioural 'nudging' interventions on management decisions for low back pain: A  
517 randomised vignette-based study in general practitioners. *BMJ Qual. & Saf.* **28**, 547–555 (2019).
- 518 196. \*AE Stämpfli, TA Brunner, The art of dieting: Exposure to thin sculptures effortlessly reduces the intake of  
519 unhealthy food in motivated eaters. *Food Qual. Prefer.* **50**, 88–93 (2016).
- 520 197. \*AE Stämpfli, S Stöckli, TA Brunner, A nudge in a healthier direction: How environmental cues help restrained

- eaters pursue their weight-control goal. *Appetite* **110**, 94–102 (2017).
- 522 198. \*M Steffel, EF Williams, R Pogacar, Ethically deployed defaults: Transparency and consumer protection  
523 through disclosure and preference articulation. *J. Mark. Res.* **53**, 865–880 (2016).
- 524 199. \*AT Stephen, DR Lehmann, How word-of-mouth transmission encouragement affects consumers' transmission  
525 decisions, receiver selection, and diffusion speed. *Int. J. Res. Mark.* **33**, 755–766 (2016).
- 526 200. \*B Stikvoort, T Lindahl, TM Daw, Thou shalt not sell nature: How taboo trade-offs can make us act  
527 pro-environmentally, to clear our conscience. *Ecol. Econ.* **129**, 252–259 (2016).
- 528 201. \*FM Stok, DTD de Ridder, E de Vet, JBF de Wit, Don't tell me what i should do, but what others do: The  
529 influence of descriptive and injunctive norms on fruit consumption in adolescents. *Br. J. Heal. Psychol.* **19**,  
530 52–64 (2014).
- 531 202. \*D Tannenbaum, CR Fox, NJ Goldstein, Partitioning menu items to nudge single-item choice. pp. 1–18 (2013).
- 532 203. \*J Tasoff, R Letzler, Everyone believes in redemption: Nudges and overoptimism in costly task completion. *J.*  
533 *Econ. Behav. & Organ.* **107**, 107–122 (2014).
- 534 204. \*R Tavernier, EK Adam, Text message intervention improves objective sleep hours among adolescents: The  
535 moderating role of race-ethnicity. *Sleep Heal.* **3**, 62–67 (2017).
- 536 205. \*MJ Taylor, I Vlaev, J Maltby, GDA Brown, AM Wood, Improving social norms interventions: Rank-framing  
537 increases excessive alcohol drinkers' information-seeking. *Heal. Psychol.* **34**, 1200–1203 (2015).
- 538 206. \*A Theotokis, E Manganari, The impact of choice architecture on sustainable consumer behavior: The role of  
539 guilt. *J. Bus. Ethics* **131**, 423–437 (2014).
- 540 207. \*AN Thorndike, J Riis, DE Levy, Social norms and financial incentives to promote employees' healthy food  
541 choices: A randomized controlled trial. *Prev. Medicine* **86**, 12–18 (2016).
- 542 208. \*L Thunström, B Gilbert, CJ Ritten, Nudges that hurt those already hurting – distributional and unintended  
543 effects of salience nudges. *J. Econ. Behav. & Organ.* **153**, 267–282 (2018).
- 544 209. \*L Trevana, L Irwig, A Barratt, Impact of privacy legislation on the number and characteristics of people who  
545 are recruited for research: A randomised controlled trial. *J. Med. Ethics* **32**, 473–477 (2006).
- 546 210. \*R Trudel, KB Murray, S Kim, S Chen, The impact of traffic light color-coding on food health perceptions and  
547 choice. *J. Exp. Psychol. Appl.* **21**, 255–275 (2015).
- 548 211. \*PA Ubel, J Baron, DA Asch, Preference for equity as a framing effect. *Med. Decis. Mak.* **21**, 180–189 (2001).
- 549 212. \*R van Bavel, N Rodríguez-Priego, J Vila, P Briggs, Using protection motivation theory in the design of nudges  
550 to improve online security behavior. *Int. J. Human-Computer Stud.* **123**, 29–39 (2019).
- 551 213. \*HP van Dalen, K Henkens, Comparing the effects of defaults in organ donation systems. *Soc. Sci. & Medicine*  
552 **106**, 137–142 (2014).
- 553 214. \*LDT van der Zanden, H van Essen, E van Kleef, R de Wijk, HCM van Trijp, Using a verbal prompt to increase  
554 protein consumption in a hospital setting: A field study. *Int. J. Behav. Nutr. Phys. Activity* **12**, 1–10 (2015).
- 555 215. \*E van Kleef, K Otten, HCM van Trijp, Healthy snacks at the checkout counter: A lab and field study on the  
556 impact of shelf arrangement and assortment structure on consumer choices. *BMC Public Heal.* **12**, 1–10 (2012).
- 557 216. \*E van Kleef, K Seijdell, MH Vingerhoeds, R de Wijk, HCM van Trijp, The effect of a default-based nudge on  
558 the choice of whole wheat bread. *Appetite* **121**, 179–185 (2018).
- 559 217. \*E van Kleef, M Shimizu, B Wansink, Serving bowl selection biases the amount of food served. *J. Nutr. Educ.*  
560 *Behav.* **44**, 66–70 (2012).
- 561 218. \*J Veldwijk, et al., Survival or mortality: Does risk attribute framing influence decision-making behavior in a  
562 discrete choice experiment? *Value Heal.* **19**, 202–209 (2016).
- 563 219. \*B Verplanken, MWH Weenig, Graphical energy labels and consumers' decisions about home appliances: A  
564 process tracing approach. *J. Econ. Psychol.* **14**, 739–752 (1993).
- 565 220. \*B Wansink, AS Hanks, Slim by design: Serving healthy foods first in buffet lines improves overall meal selection.  
566 *PLoS ONE* **8**, 1–5 (2013).
- 567 221. \*B Wansink, J Kim, Bad popcorn in big buckets: Portion size can influence intake as much as taste. *J. Nutr.*  
568 *Educ. Behav.* **37**, 242–245 (2005).
- 569 222. \*B Wansink, K van Ittersum, Bottoms up! the influence of elongation on pouring and consumption volume. *J.*  
570 *Consumer Res.* **30**, 455–463 (2003).
- 571 223. \*B Wansink, A Cardello, J North, Fluid consumption and the potential role of canteen shape in minimizing  
572 dehydration. *Mil. Medicine* **170**, 871–873 (2005).
- 573 224. \*B Wansink, JE Painter, J North, Bottomless bowls: Why visual cues of portion size may influence intake.  
574 *Obes. Res.* **13**, 93–100 (2005).
- 575 225. \*B Wansink, D Soman, KC Herbst, Larger partitions lead to larger sales: Divided grocery carts alter purchase  
576 norms and increase sales. *J. Bus. Res.* **75**, 202–209 (2017).



- 577 226. \*B Wansink, K van Ittersum, JE Painter, Ice cream illusions: Bowls, spoons, and self-served portion sizes. *Am.*  
578 *J. Prev. Medicine* **31**, 240–243 (2006).
- 579 227. \*B Wansink, K van Ittersum, CR Payne, Larger bowl size increases the amount of cereal children request,  
580 consume, and waste. *The J. Pediatr.* **164**, 323–326 (2014).
- 581 228. \*L Xue, S Sitzia, TL Turocy, Mathematics self-confidence and the "prepayment effect" in riskless choice. *J.*  
582 *Econ. Behav. & Organ.* **135**, 239–250 (2017).
- 583 229. \*M Yeomans, D Herberich, An experimental test of the effect of negative social norms on energy-efficient  
584 investments. *J. Econ. Behav. & Organ.* **108**, 187–197 (2014).
- 585 230. \*SD Young, B Monin, D Owens, Opt-out testing for stigmatized diseases: A social psychological approach to  
586 understanding the potential effect of recommendations for routine HIV testing. *Heal. Psychol.* **28**, 675–681  
587 (2009).
- 588 231. \*HS Zarghamee, et al., Nudging charitable giving: Three field experiments. *J. Behav. Exp. Econ.* **66**, 137–149  
589 (2017).
- 590 232. \*GG Zeinstra, RJ Renes, MA Koelen, FJ Kok, C de Graaf, Offering choice and its effect on dutch children's  
591 liking and consumption of vegetables: A randomized controlled trial. *The Am. J. Clin. Nutr.* **91**, 349–356  
592 (2010).
- 593 233. \*BJ Zikmund-Fisher, PD Windschitl, N Exe, PA Ubel, "i'll do what they did": Social norm information and  
594 cancer treatment decisions. *Patient Educ. Couns.* **85**, 225–229 (2011).
- 595 234. \*FM Zuraikat, LS Roe, AD Smethers, BJ Rolls, Doggy bags and downsizing: Packaging uneaten food to go  
596 after a meal attenuates the portion size effect in women. *Appetite* **129**, 162–170 (2018).
